# Supplementary material for: The Association between the Pan-Immune-Inflammation Value and Cancer Prognosis: A Systematic Review and Meta-Analysis
Source: MDPI journal article supplement (doi:10.3390/cancers14112675), 2022-05-27
Supplement: s1 [file s1]

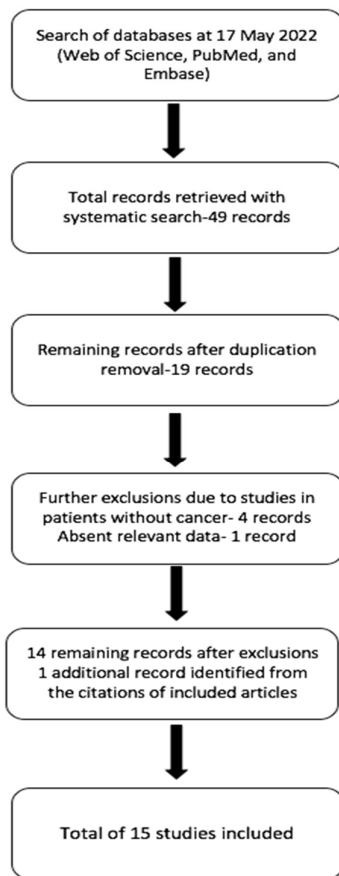

Supplementary Figure S1. PRISMA flow diagram

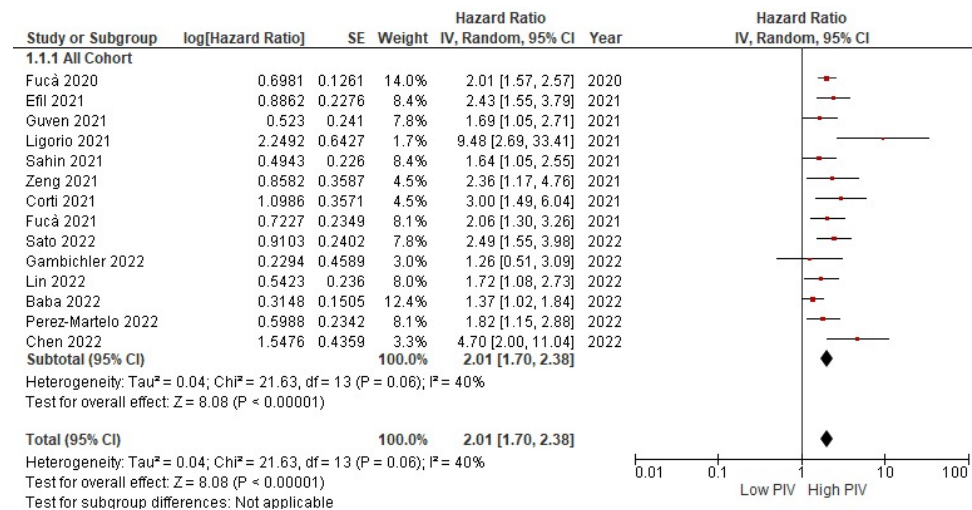

Supplementary Figure S2. Overall survival with a fixed-effect meta-analysis after the exclusion of study by Susok et al.

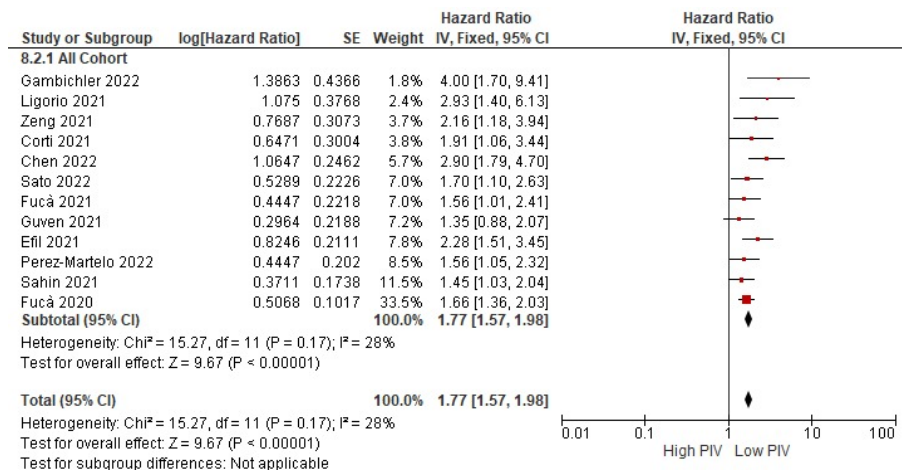

**Supplementary Figure S3.** Progression-free survival with a fixed-effect meta-analysis after the exclusion of study by Susok et al.

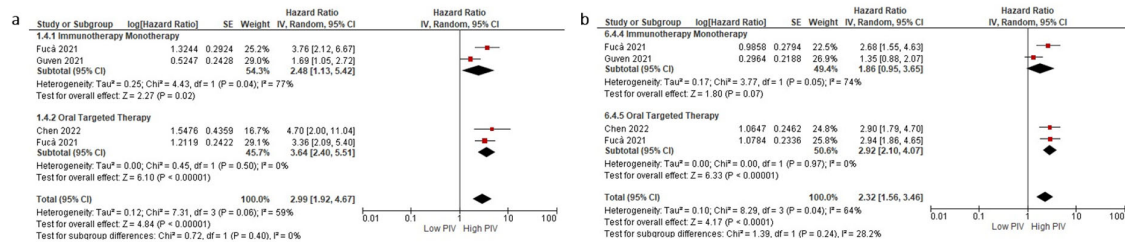

**Supplementary Figure S4.** Subgroup analyses according to treatment type in OS (a) and DFS/PFS (b). Lines(○) indicate 95% CIs. Diamond(♦) indicates the pooled effect size.
